# Supplementary material for: Highly improved acetone oxidation activity over mesoporous hollow nanospherical MnxCo3−xO4 solid solutions
Source: Royal Society of Chemistry journal article supplement (doi:10.1039/c9cy01791g), 2019-01-01
Supplement: c9cy01791g1.pdf [file c9cy01791g1.pdf]

## Supporting Information

### Highly improved acetone oxidation activity over mesoporous hollow nanospherical $\text{Mn}_x\text{Co}_{3-x}\text{O}_4$ solid solution

Jinguo Wang\*, Chi Zhang, Shuaifeng Yang, Hao Liang and Yong Men

*College of Chemistry and Chemical Engineering, Shanghai University of Engineering  
Science, Shanghai 201620, P. R. China*

\*Author to whom correspondence should be addressed. E-mail address:

Jinguowang1982@sues.edu.cn, Tel: +86-21 6787 4046

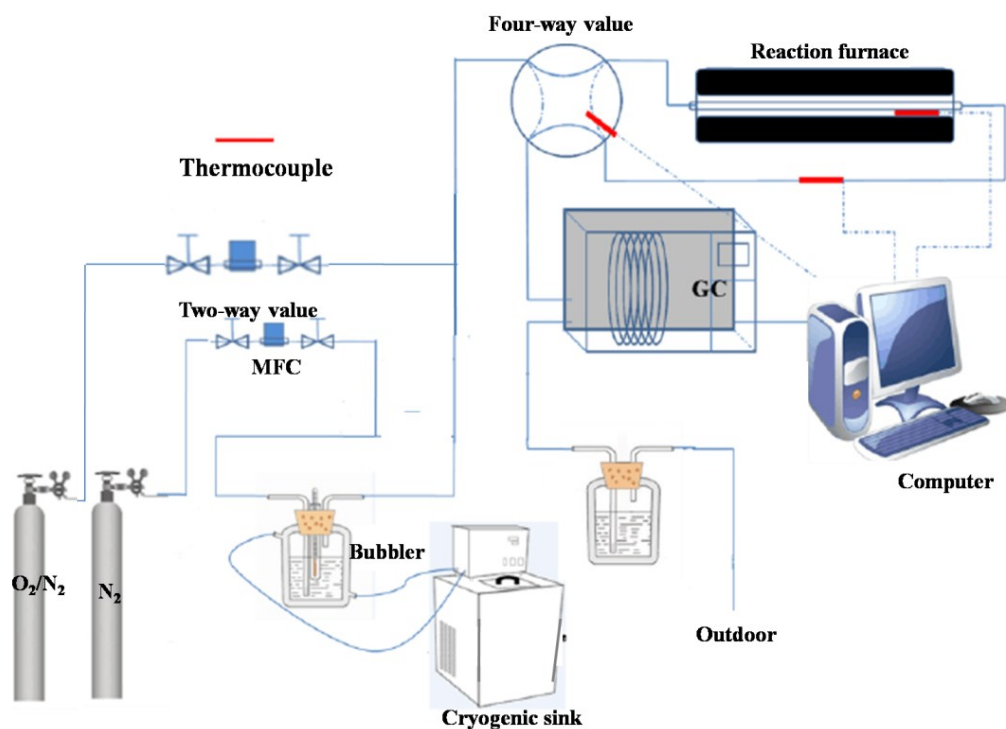

**Fig. S1** Schematic flowing chart of the reaction system for acetone oxidation.

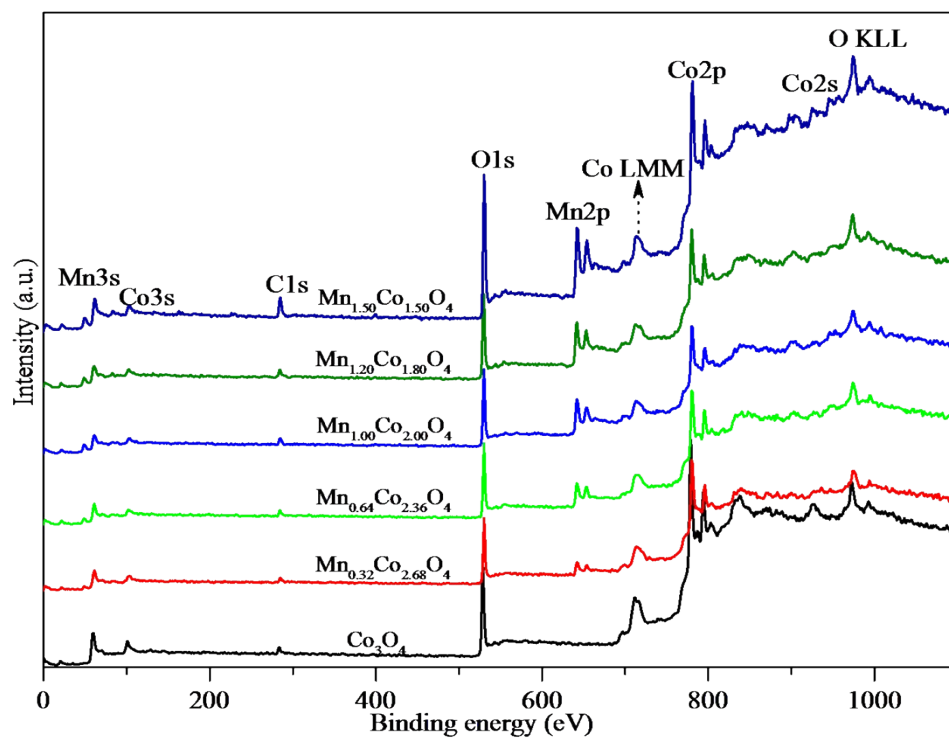

Fig. S2 XPS surveys of different catalysts.

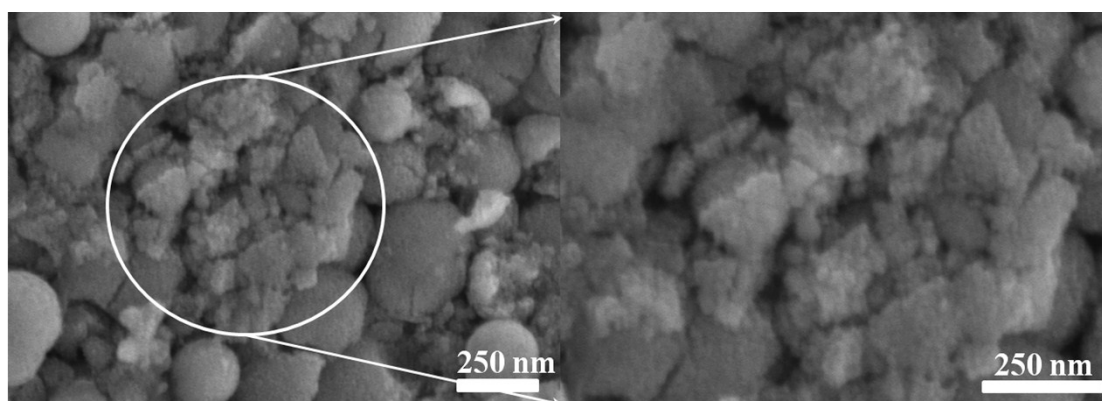

Fig. S3 FESEM images of the crushed  $\text{Mn}_{1.20}\text{Co}_{1.80}\text{O}_4$ .

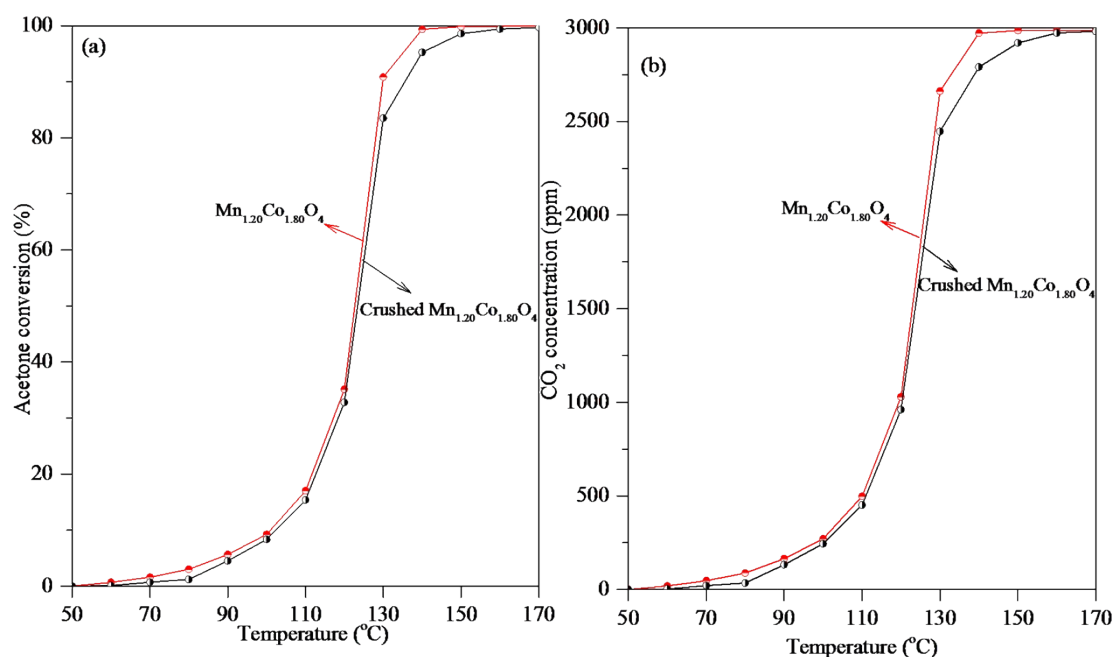

**Fig. S4** Acetone conversion curves (a) and the produced  $\text{CO}_2$  concentration curves (b) over  $\text{Mn}_{1.20}\text{Co}_{1.80}\text{O}_4$  and crushed  $\text{Mn}_{1.20}\text{Co}_{1.80}\text{O}_4$ .

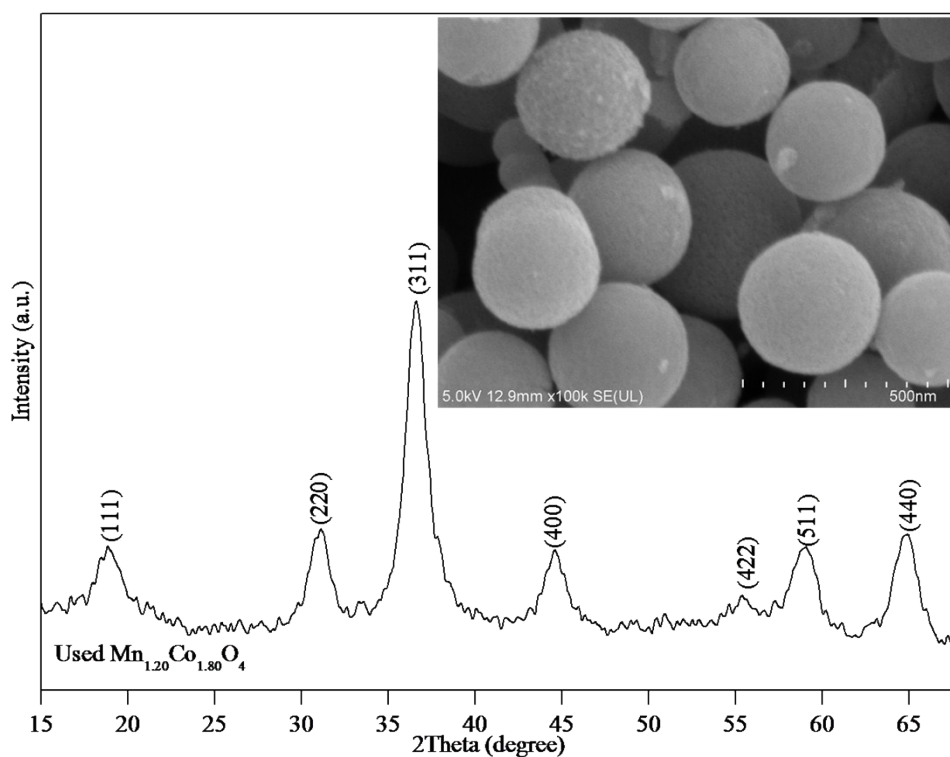

**Fig. S5** XRD pattern and FESEM image (inset) of  $\text{Mn}_{1.20}\text{Co}_{1.80}\text{O}_4$  after reacting 60 h at 140  $^{\circ}\text{C}$  with the effect of  $\text{H}_2\text{O}$  vapor.

**Table S1** Activity data of different catalysts for acetone oxidation as previous studies.

| Catalyst                                                   | Acetone (ppm) | O <sub>2</sub> (vol%) | T <sub>50</sub> (°C) | T <sub>90</sub> (°C) | Reference |
|------------------------------------------------------------|---------------|-----------------------|----------------------|----------------------|-----------|
| Mn <sub>1.20</sub> Co <sub>1.80</sub> O <sub>4</sub>       | 1000          | 20                    | 122                  | 130                  | This work |
| CuCo <sub>2</sub> O <sub>4</sub> hollow spheres            | 1000          | 20                    | 157                  | 183                  | 1         |
| NiCo <sub>2</sub> O <sub>4</sub> hollow spheres            | 1000          | 20                    | 167                  | 193                  | 1         |
| CoCo <sub>2</sub> O <sub>4</sub> hollow spheres            | 1000          | 20                    | 174                  | 202                  | 1         |
| Ordered mesoporous Fe <sub>2</sub> O <sub>3</sub>          | 1000          | 20                    | 136                  | 186                  | 2         |
| CoAl mixed oxides                                          | 1000          | 20                    | 189                  | 222                  | 3         |
| Cu <sub>0.13</sub> Ce <sub>0.87</sub> O <sub>y</sub> foam  | 1000          | 20                    | 200                  | 223                  | 4         |
| MnO <sub>x</sub> /TiO <sub>2</sub> nanofibers              | 500           | 5.0                   | 275                  | 360                  | 5         |
| CuCeO <sub>x</sub> nanofibers                              | 500           | 20                    | 190                  | 225                  | 6         |
| V-TiO <sub>2</sub> -carbon composite                       | 500           | 5.0                   | 230                  | 292                  | 7         |
| V <sub>2</sub> O <sub>5</sub> /TiO <sub>2</sub> nanofibers | 500           | 5.0                   | 270                  | 300                  | 8         |
| Au/Fe <sub>2</sub> O <sub>3</sub> nanoparticles            | 700           | 10                    | ≈235                 | ≈268                 | 9         |
| Au/CeO <sub>2</sub> nanoparticles                          | 700           | 10                    | 218                  | 240                  | 10        |
| Ag/CeO <sub>2</sub> nanoparticles                          | 700           | 10                    | 220                  | 245                  | 10        |
| Cu/CeO <sub>2</sub> nanoparticles                          | 700           | 10                    | 240                  | 260                  | 10        |

**References:**

- 1 C. Zhang, J. G. Wang, S. F. Yang, H. Liang and Y. Men, *J. Colloid Interf. Sci.*, 2019, 539, 65-75.
- 2 Y. S. Xia, H. X. Dai, H. Y. Jiang, J. G. Deng and Y. X. Liu, *J. Hazard. Mater.*, 2011, 186, 84-91.
- 3 Q. Zhao, Y. L. Ge, K. X. Fu, N. Ji, C. F. Song and Q. L. Liu, *Chemosphere*, 2018,

204, 257-266.

4 C. Q. Hu, Q. S. Zhu, Z. Jiang, L. Chen and R. F. Wu, *Chem. Eng. J.*, 2009, 152, 583-590.

5 X. C. Zhu, S. Zhang, X. N. Yu, X. B. Zhu, C. H. Zheng, X. Gao, Z. Y. Luo and K. F. Cen, *J. Hazard. Mater.*, 2017, 337, 105-114.

6 R. Qin, J. H. Chen, X. Gao, X. B. Zhu, X. N. Yu and K. F. Cen, *RSC Adv.*, 2014, 4, 43874-43881.

7 J. H. Chen, X. N. Yu, X. C. Zhu, C. H. Zheng, X. Gao and K. F. Cen, *Appl. Catal., A*, 2015, 507, 99-108.

8 X. C. Zhu, J. H. Chen, X. N. Yu, X. B. Zhu, X. Gao and K. F. Cen, *RSC Adv.*, 2015, 5, 30416-30424.

9 S. Minicò, S. Scirè, C. Crisafulli and S. Galvagno, *Appl. Catal., B*, 2001, 34, 277-285.

10 S. Scirè, P.M. Riccobene and C. Crisafulli, *Appl. Catal., B*, 2010, 101, 109-117.
